# Supplementary material for: Implementing at-scale, community-based distribution of misoprostol tablets to mothers in the third stage of labor for the prevention of postpartum haemorrhage in Sokoto State, Nigeria: Early results and lessons learned
Source: PLoS One. 2017 Feb 24;12(2):e0170739. doi: 10.1371/journal.pone.0170739 (PMC5325195; doi:10.1371/journal.pone.0170739)
Supplement: S1 File — (XLSX) [file pone.0170739.s001.xlsx]

## Sheet: Outcome form
NOTE: Please do not capture information that is not up to 42 days (for MOTHER) after delivery on this OUTCOME form. Use the column provided for DATE on the DISPENSING register as a guide
SOKOTO STATE GOVERNMENT MISOPROSTOL & CHLORHEXIDINE
PATIENTS OUTCOME FORM
Name of Drug Keeper………………………...…………………….. Name of LGA………………….………………... Name of Ward………………………..……
Woman Identification				Mother									Baby
S/N	Delivery Date	Patient Name	Woman Village/Compound Name	Miso used: Yes/No	Condition of mother			Side effects:					Baby Sex M:F	Chx used Yes/No	Condition of baby:			Side Effects:
					Heavy Bleeding Yes/No	Referred Yes/No	At 1 - 42 days. Dead/ Alive	Misoprostol Yes/No							At birth	At one week	At one month	Chlorhexidine Yes/No
								Vomiting	Nausea	Diarrhea	Shivering	Abd cramps			Alive/ Dead	Alive/ Dead	Alive/ Dead	Redness	Skin rashes	Discharges	Swelling
1
2
3
4
5
6
7
8
9
10
11
12
13
14
15
